# Supplementary material for: Chitosan Hydrogel Structure Modulated by Metal Ions
Source: PubMed Central journal article supplement (PMC5078770; doi:10.1038/srep36005), 2016-10-25
Supplement: srep36005-s1.pdf [file srep36005-s1.pdf]

## Supplementary Material

### Chitosan Hydrogel Structure Modulated by Metal Ions

**Jingyi Nie,<sup>1,2</sup> Zhengke Wang,<sup>1,2</sup>\* Qiaoling Hu<sup>1,2</sup>**

<sup>1</sup> MoE Key Laboratory of Macromolecular Synthesis and Functionalization,  
Department of Polymer Science and Engineering, Zhejiang University, Hangzhou,  
China. <sup>2</sup> Key Laboratory of Adsorption and Separation Materials & Technologies of  
Zhejiang Province, Hangzhou, China.

Correspondence and requests for materials should be addressed to Z.K.W. (email:  
wangzk@zju.edu.cn).

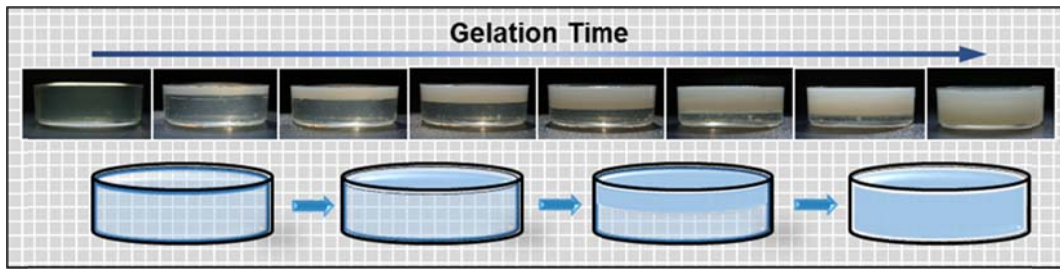

**Supplementary Figure 1** | Digital photographs and scheme of the gelation process of

CS hydrogel.

Gelation process of CS solution was recorded by digital photographs. Instead of forming cross-links in the whole system simultaneously, there existed a distinct gel-sol interface.  $\text{OH}^-$  diffused into the system to generate gelation gradually, and the thickness of the hydrogel increased with gelation time. So the formation of CS gel possessed a layer-wise characteristic, and brings spatiotemporal sequence to the system.

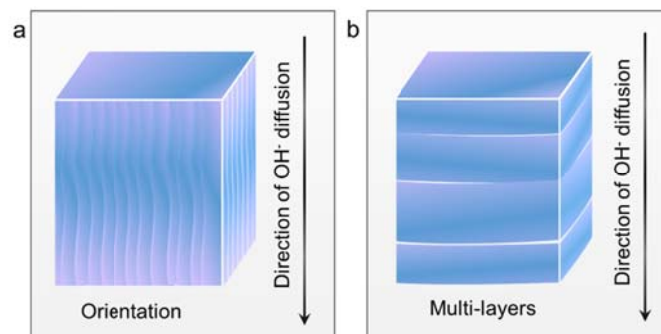

**Supplementary Figure 2** | Schematic illustration of typical structure in CS

hydrogel. (a) oriented structure; (b) multi-layered structure.

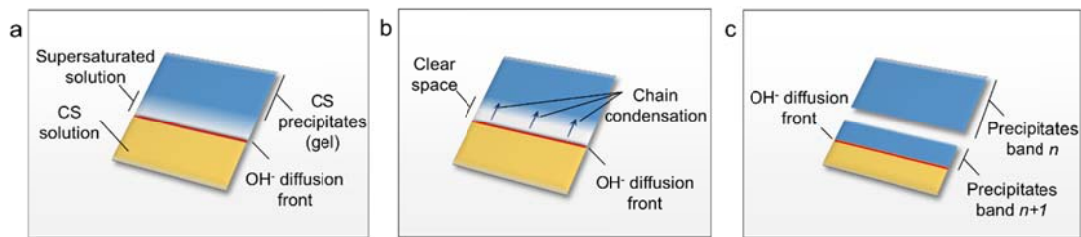

**Supplementary Figure 3** | Schematic illustration of the layer formation in CS system

5 by Liesegang Ring supersaturation theory.

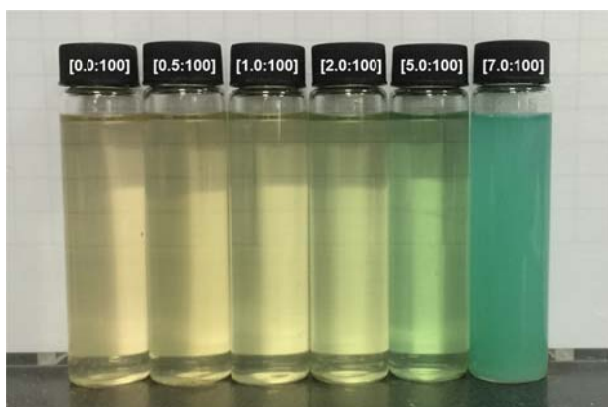

5

**Supplementary Figure 4** | Images of Cu<sup>2+</sup>-CS solution with different molar ratios of

Cu<sup>2+</sup> and amino group.

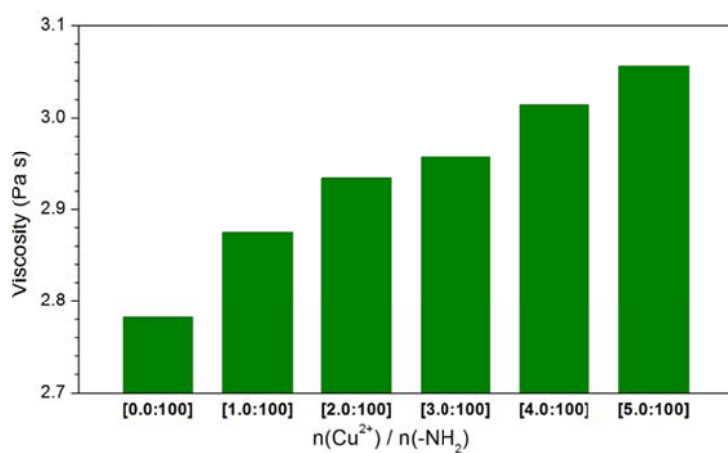

**Supplementary Figure 5** | Influence of  $n(\text{Cu}^{2+})/n(-\text{NH}_2)$  on the viscosity of Cu<sup>2+</sup>-CS

solution.

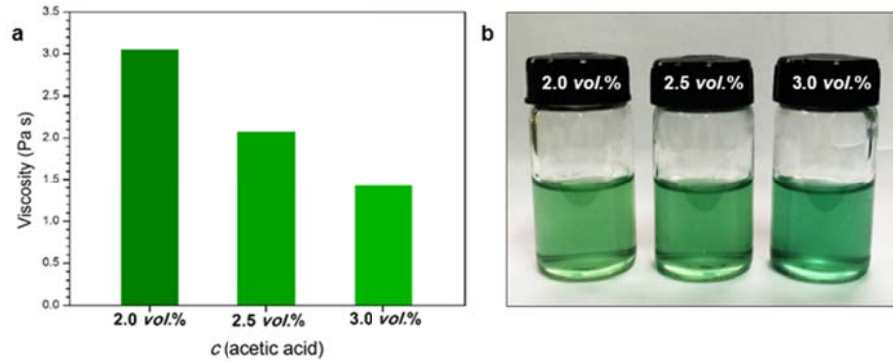

5 **Supplementary Figure 6** | Influence of  $c(\text{acetic acid})$  on the viscosity of solution.

With the increase of  $c(\text{H}^+)$ , the ratio of protonation of CS macromolecule increased.

Thus the amount of amino groups that can form complexes with  $\text{Cu}^{2+}$  decreased,

10 leading to the decrease of solution viscosity.

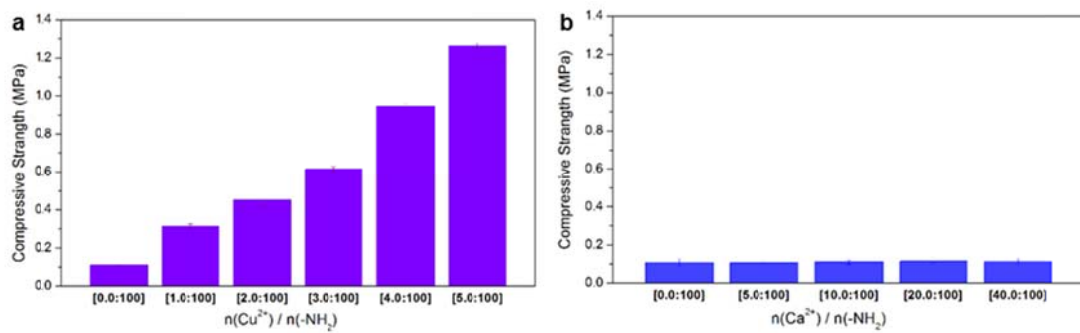

**Supplementary Figure 7** | Influence of metallic ions on the strength of CS

**hydrogel.** (a) Influence with different molar ratios of  $\text{Cu}^{2+}$  and amino group; (b)

Influence with different molar ratio of  $\text{Ca}^{2+}$  and amino group.

The mechanical property of CS hydrogels were obtained on a universal materials testing machine (Instron, 5543A) at a strain rate of  $2\% \text{ min}^{-1}$  for compression tests at room temperature. Hydrogels were prepared to be cylinder samples.

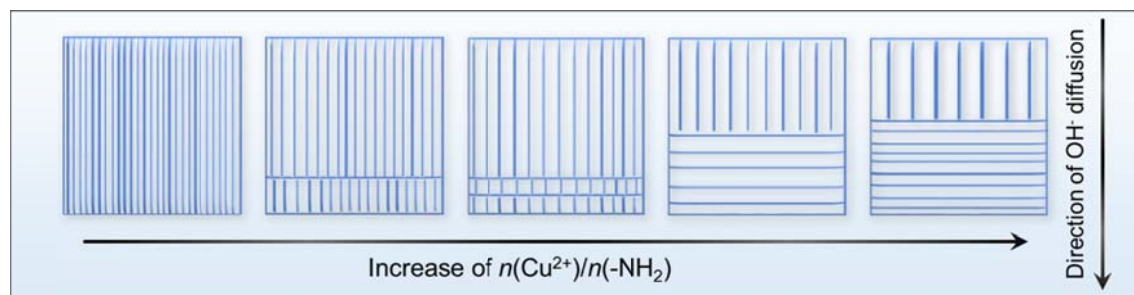

**Supplementary Figure 8** | Schematic structural transition of copper-CS hydrogel with the increase of  $n(\text{Cu}^{2+})/n(-\text{NH}_2)$ .

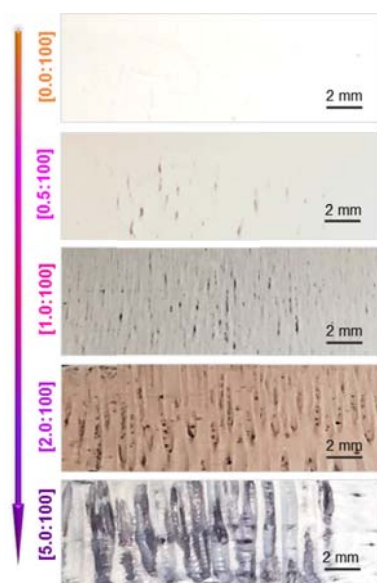

**Supplementary Figure 9** | Digital images of the oriented regions in freeze-dried copper-CS hydrogels, with different molar ratios of  $\text{Cu}^{2+}$  and amino group.

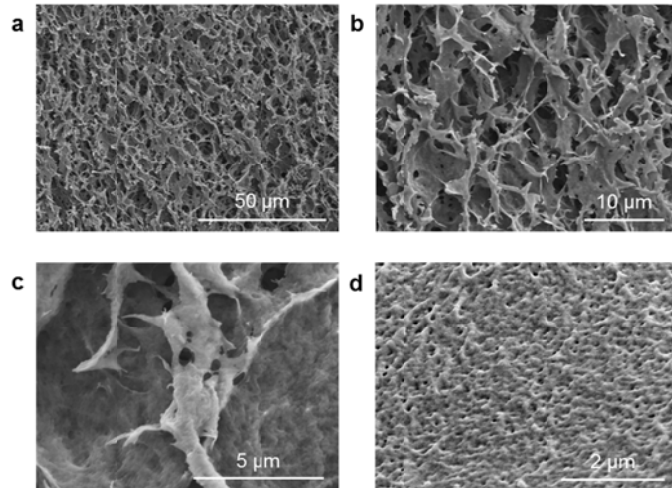

**Supplementary Figure 10** | SEM images of freeze-dried copper-CS hydrogel

5 samples, with different magnification.

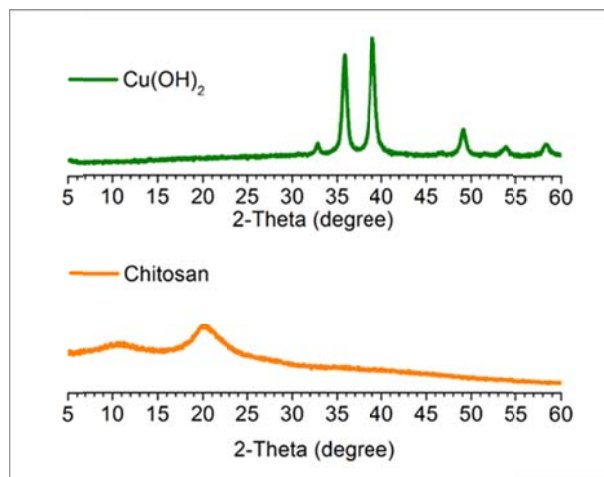

5

**Supplementary Figure 11** | XRD profiles of  $\text{Cu}(\text{OH})_2$  and CS raw material.

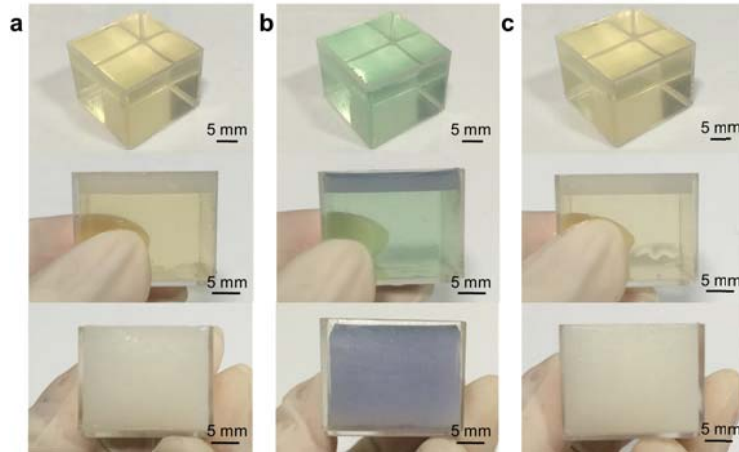

5 **Supplementary Figure 12 | Digital images of gelation process of CS solution and CS solution with metal ions.** (a) CS solution; (b) CS solution with  $\text{Cu}^{2+}$  ions,  $n(\text{Cu}^{2+})/n(-\text{NH}_2)=5.0:100$ ; (c) CS solution with  $\text{Ca}^{2+}$  ions,  $n(\text{Ca}^{2+})/n(-\text{NH}_2)=40.0:100$ .

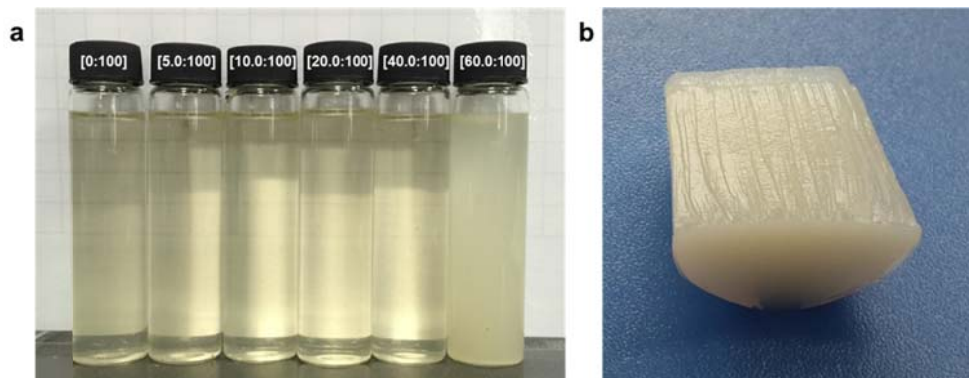

10 **Supplementary Figure 13 | Digital image of  $\text{Ca}^{2+}$ -CS solution and calcium-CS hydrogel.** (a)  $\text{Ca}^{2+}$ -CS solution with different molar ratios of  $\text{Ca}^{2+}$  and amino group. (b) The longitudinal section of calcium-CS hydrogel.

When other parameters were fixed, the solution samples were clear with  $n(\text{Ca}^{2+})/n(-\text{NH}_2)$  lower than 40.0:100 (molar ratios of  $\text{Ca}^{2+}$  and amino groups), and became cloudy when  $c(\text{Ca}^{2+})$  kept increasing.

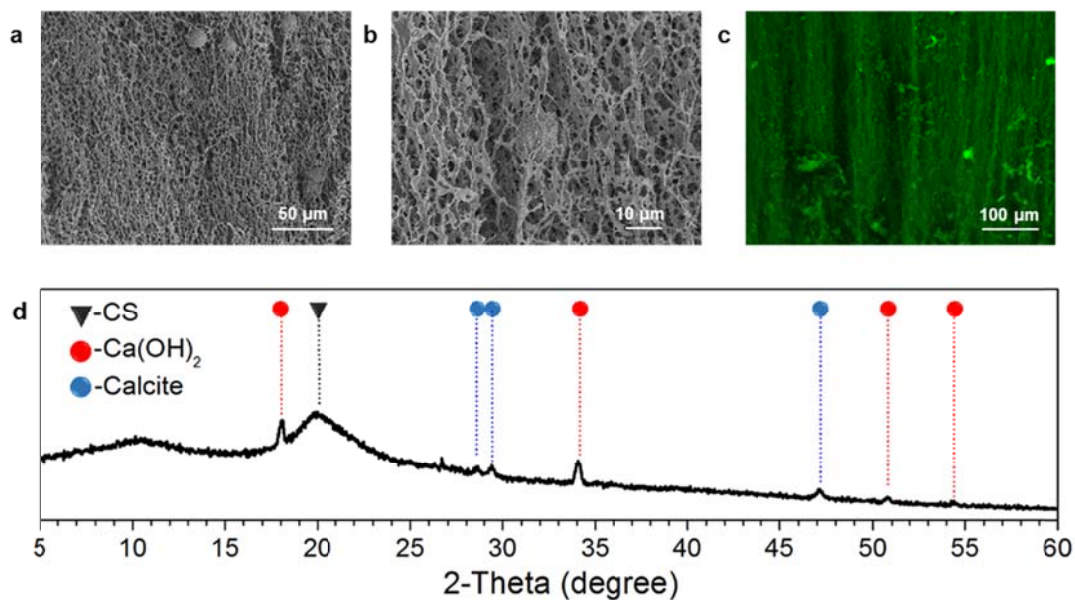

**Supplementary Figure 14 | Microscopic structure of calcium-CS hydrogel,**

$n(\text{Ca}^{2+})/n(-\text{NH}_2)=5.0:100$ . (a), (b) SEM images of freeze-dried calcium-CS hydrogel sample; (c) CLSM image of calcium-CS hydrogel; (d) XRD profile of calcium-CS hydrogel sample prepared by *in-situ* precipitation.



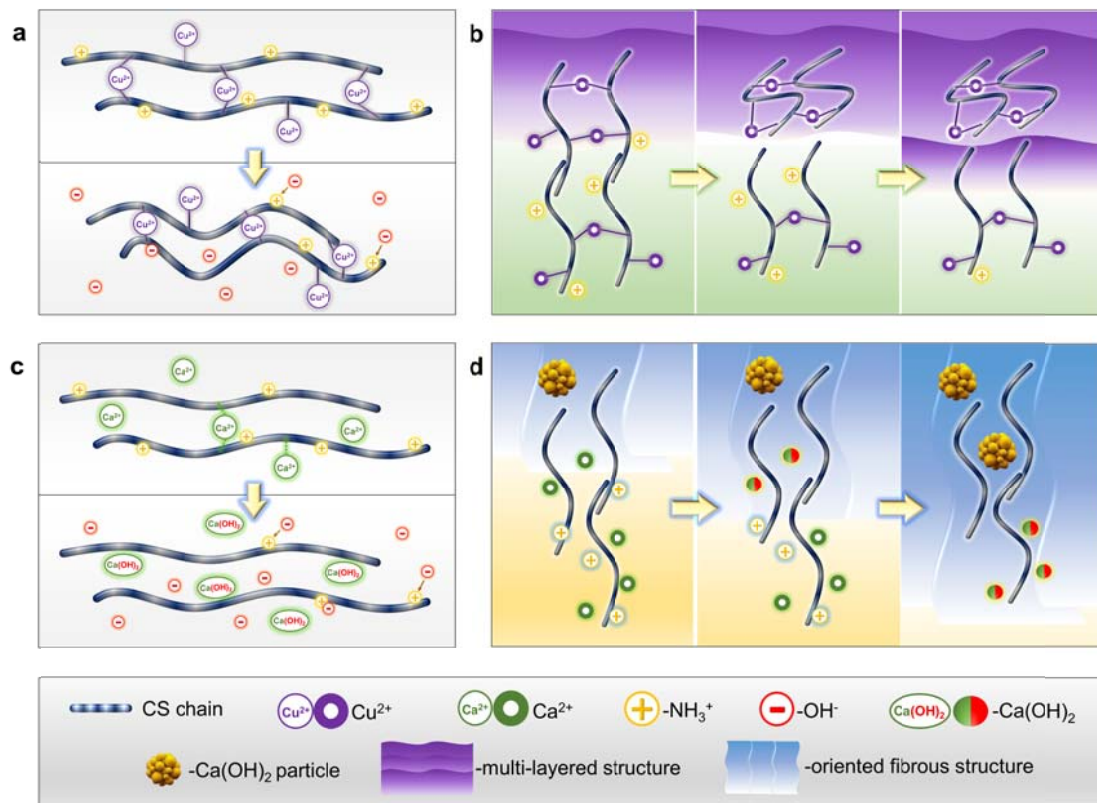

**Supplementary Figure 15 | Schematic illustration of the interaction among CS and metal ions during gelation process. (a), (b) copper-CS system; (c), (d) calcium-CS system; inter/intramolecular interaction among CS chains was not depicted in this scheme for simplicity.**

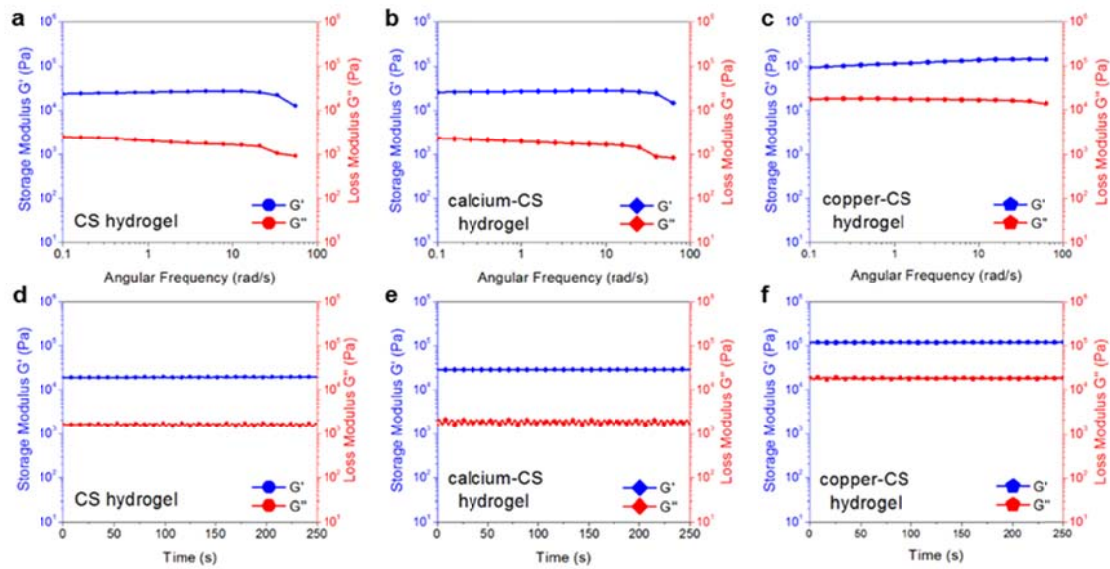

**Supplementary Figure 16** | (a-c) dynamic frequency sweep of storage moduli and the loss moduli of the hydrogel: (a) pure CS hydrogel, (b) calcium-CS hydrogel, (c) copper-CS hydrogel; (d-f) dynamic time sweep of storage moduli and the loss moduli of the hydrogel: (d) pure CS hydrogel, (e) calcium-CS hydrogel, (f) copper-CS hydrogel;  $n(\text{Cu}^{2+})/n(-\text{NH}_2)=5.0:100$  and  $n(\text{Ca}^{2+})/n(-\text{NH}_2)=5.0:100$ .

Supplementary Fig. S16 showed the rheological data of pure CS hydrogel, calcium-CS hydrogel, and copper-CS hydrogel. Dynamic frequency sweep and dynamic time sweep measurements were performed on the samples. (1) Dynamic frequency sweep of the hydrogels was performed at 0.5% strain. For all the hydrogel samples, the values of the storage modulus ( $G'$ ) was much higher than that of the loss modulus ( $G''$ ) in the scanning range. The  $G'$  was always dominant in contrast with the  $G''$ , indicating

the elastic nature of these gel. (2) Dynamic time sweep of  $G'$  and  $G''$  of the hydrogel was performed at the strain of 0.5% and at the frequency of 1 rad/s. Dynamic time sweep data showed that the value of  $G'$  and  $G''$  remained constant during the entire measurement. (3) The value of  $G'$  and  $G''$  of calcium-CS hydrogel were similar to those of pure CS hydrogel, respectively. While for copper-CS hydrogel, the  $G'$  and  $G''$  value were much higher. This supported the point discussed in the main text. The introduction of metal ions that has strong affinity with CS, such as  $\text{Cu}^{2+}$  ions, leads to strong ionic cross-linking and enhanced mechanical property. On the other hand,  $\text{Ca}^{2+}$  ions have weak affinity with CS and will not increase the mechanical property apparently.
